# Supplementary material
Source: PubMed Central journal article supplement (PMC6533067)
Supplement: NIHMS1029037-supplement-Supplemental_Tables.pdf [file NIHMS1029037-supplement-Supplemental_Tables.pdf]

Supplemental Table 1: Patient characteristics for the four anemia cohorts and “High” discharge Hb versus “Low” discharge Hb cohorts

(Subgroup of older patients – age ≥ 65 years)

| Parameter                            | Anemia Hb Cohorts  |                       |                         |                     |         | “Low” vs. “High” Hb Cohorts |                        |         |
|--------------------------------------|--------------------|-----------------------|-------------------------|---------------------|---------|-----------------------------|------------------------|---------|
|                                      | “Severe”           | “Moderate”            | “Mild”                  | “No”                | P-value | “Low”                       | “High”                 | P-Value |
|                                      | < 8 g/dL<br>(n=58) | 8-9.9 g/dL<br>(n=523) | 10-11.9 g/dL<br>(n=207) | ≥ 12 g/dL<br>(n=12) |         | (<9.4 g/dL)<br>(n=410)      | (≥9.4 g/dL)<br>(n=390) |         |
| <b>Age (years)</b>                   | 72 ± 6             | 73 ± 6                | 73 ± 6                  | 73 ± 6              | 0.35    | 73 ± 6                      | 73 ± 6                 | 0.39    |
| <b>Sex (% Male)</b>                  | 45 (77.6)          | 383 (73.2)            | 141 (68.1)              | 9 (75.0)            | 0.42    | 213 (76.1)                  | 266 (68.2)             | 0.01    |
| <b>CCI</b>                           | 2 (1 – 3)          | 2 (1 – 4)             | 2 (1 – 4)               | 2 (0.25 – 3)        | 0.61    | 2 (1 – 4)                   | 2 (1 – 4)              | 0.48    |
| <b>ASA Score</b>                     | 3 (3 – 4)          | 3 (3 – 4)             | 3 (3 – 4)               | 3 (3 – 3)           | 0.10    | 3 (3 – 4)                   | 3 (3 – 4)              | 0.27    |
| <b>% Redo Sternotomy</b>             | 7 (12.1)           | 11 (2.1)              | 8 (3.9)                 | 0 (0.0)             | 0.005   | 14 (3.4)                    | 12 (3.1)               | 0.79    |
| <b>Initial Hb (g/dL)</b>             | 13.1 ± 1.9         | 12.9 ± 1.8            | 13.2 ± 2.0              | 14.6 ± 1.1          | 0.004   | 12.8 ± 1.9                  | 13.2 ± 1.9             | 0.002   |
| <b>Trigger Hb (g/dL)<sup>a</sup></b> | 7.3 ± 0.4          | 7.7 ± 0.7             | 7.9 ± 1.0               | 9.3 ± 0.9           | <0.0001 | 7.6 ± 0.7                   | 7.9 ± 0.9              | 0.0002  |
| <b>Discharge Hb (g/dL)</b>           | 7.6 ± 0.2          | 9.0 ± 0.6             | 10.6 ± 0.5              | 12.8 ± 0.5          | <0.0001 | 8.5 ± 0.5                   | 10.3 ± 0.8             | <0.0001 |
| <b>Comorbidities:</b>                |                    |                       |                         |                     |         |                             |                        |         |
| <b>CHF</b>                           | 13 (22.4)          | 122 (23.3)            | 57 (27.5)               | 2 (16.7)            | 0.63    | 94 (22.9)                   | 100 (25.6)             | 0.37    |

|                              |           |            |            |           |      |            |            |      |
|------------------------------|-----------|------------|------------|-----------|------|------------|------------|------|
| <b>Hypertension</b>          | 47 (81.0) | 433 (82.8) | 176 (85.0) | 10 (83.3) | 0.84 | 340 (82.9) | 326 (83.6) | 0.80 |
| <b>PVD</b>                   | 13 (22.4) | 93 (17.8)  | 42 (20.3)  | 2 (16.7)  | 0.71 | 74 (18.1)  | 76 (19.5)  | 0.60 |
| <b>Pulmonary<br/>Disease</b> | 5 (8.6)   | 99 (18.9)  | 36 (17.4)  | 5 (41.7)  | 0.04 | 73 (17.8)  | 72 (18.5)  | 0.81 |
| <b>Diabetes</b>              | 19 (32.8) | 145 (27.7) | 66 (31.9)  | 2 (16.7)  | 0.49 | 115 (28.1) | 117 (30.0) | 0.54 |
| <b>Renal Disease</b>         | 12 (20.7) | 111 (21.2) | 44 (21.3)  | 0 (0.0)   | 0.37 | 83 (20.2)  | 84 (21.5)  | 0.65 |

---

CCI – Charlson Comorbidity Index, Hb – Hemoglobin, CHF – Congestive heart failure, PVD – Peripheral vascular disease

*a* – Only patients who were transfused were included.

Values are reported as Mean ± SD, No. (%), or Median (IQR) as appropriate.

Supplemental Table 2: Patient characteristics for the four anemia cohorts and “High” discharge Hb versus “Low” discharge Hb cohorts

(Subgroup of younger patients – age &lt; 65 years)

| Parameter                      | Anemia Hb Cohorts              |                                     |                                   |                             | P-value | “Low” vs. “High” Hb Cohorts     |                                  |         |
|--------------------------------|--------------------------------|-------------------------------------|-----------------------------------|-----------------------------|---------|---------------------------------|----------------------------------|---------|
|                                | “Severe”<br>< 8 g/dL<br>(n=71) | “Moderate”<br>8-9.9 g/dL<br>(n=453) | “Mild”<br>10-11.9 g/dL<br>(n=191) | “No”<br>≥ 12 g/dL<br>(n=37) |         | “Low”<br>(<9.4 g/dL)<br>(n=396) | “High”<br>(≥9.4 g/dL)<br>(n=356) | P-Value |
| Age (years)                    | 55 ± 7                         | 57 ± 6                              | 56 ± 7                            | 57 ± 6                      | 0.38    | 56 ± 6                          | 56 ± 7                           | 0.89    |
| Sex (% Male)                   | 54 (76.1)                      | 356 (78.6)                          | 153 (80.1)                        | 34 (91.9)                   | 0.22    | 311 (78.5)                      | 286 (80.3)                       | 0.54    |
| CCI                            | 2 (1 – 3)                      | 2 (1 – 4)                           | 2 (1 – 3)                         | 2 (1 – 3)                   | 0.88    | 2 (1 – 3.75)                    | 2 (1 – 3)                        | 0.64    |
| ASA Score                      | 3 (3 – 4)                      | 3 (3 – 4)                           | 3 (3 – 4)                         | 3 (3 – 4)                   | 0.80    | 3 (3 – 4)                       | 3 (3 – 4)                        | 0.03    |
| % Redo Sternotomy              | 2 (2.8)                        | 7 (1.6)                             | 4 (2.1)                           | 0 (0.0)                     | 0.69    | 7 (1.8)                         | 6 (1.7)                          | 0.93    |
| Initial Hb (g/dL)              | 12.8 ± 1.9                     | 13.1 ± 2.0                          | 13.6 ± 2.0                        | 14.9 ± 1.9                  | <0.0001 | 12.9 ± 1.9                      | 13.7 ± 2.0                       | <0.0001 |
| Trigger Hb (g/dL) <sup>a</sup> | 7.2 ± 0.5                      | 7.5 ± 0.8                           | 7.9 ± 1.0                         | 7.9 ± 1.2                   | <0.0001 | 7.5 ± 0.7                       | 7.7 ± 1.0                        | 0.003   |
| Discharge Hb (g/dL)            | 7.6 ± 0.3                      | 9.0 ± 0.5                           | 10.7 ± 0.5                        | 12.6 ± 0.8                  | <0.0001 | 8.5 ± 0.6                       | 10.5 ± 1.0                       | <0.001  |
| <b>Comorbidities:</b>          |                                |                                     |                                   |                             |         |                                 |                                  |         |
| CHF                            | 15 (21.1)                      | 95 (21.0)                           | 36 (18.9)                         | 6 (16.2)                    | 0.85    | 92 (23.2)                       | 60 (16.8)                        | 0.03    |

|                              |           |            |            |           |      |            |            |       |
|------------------------------|-----------|------------|------------|-----------|------|------------|------------|-------|
| <b>Hypertension</b>          | 57 (80.3) | 345 (76.2) | 146 (76.4) | 25 (67.6) | 0.55 | 302 (76.0) | 271 (76.1) | 0.96  |
| <b>PVD</b>                   | 11 (15.5) | 57 (12.6)  | 22 (11.5)  | 2 (5.4)   | 0.50 | 51 (12.9)  | 41 (11.5)  | 0.57  |
| <b>Pulmonary<br/>Disease</b> | 7 (9.9)   | 69 (15.2)  | 31 (16.2)  | 7 (18.9)  | 0.52 | 60 (15.2)  | 54 (15.2)  | 0.99  |
| <b>Diabetes</b>              | 30 (42.3) | 117 (25.8) | 61 (31.9)  | 11 (29.7) | 0.03 | 119 (30.1) | 100 (28.1) | 0.55  |
| <b>Renal Disease</b>         | 14 (19.7) | 84 (18.5)  | 23 (12.0)  | 1 (2.7)   | 0.01 | 78 (19.7)  | 44 (12.4)  | 0.006 |

---

CCI – Charlson Comorbidity Index, Hb – Hemoglobin, CHF – Congestive heart failure, PVD – Peripheral vascular disease

*a* – Only patients who were transfused were included.

Values are reported as Mean ± SD, No. (%), or Median (IQR) as appropriate.

Supplemental Table 3: Clinical outcomes for the four anemia cohorts and “High” discharge Hb versus “Low” discharge Hb cohorts

(Subgroup of older patients – age ≥ 65 years)

| Parameter                    | Anemia Hb Cohorts  |                       |                         |                     | P-value | “Low” vs. “High” Hb Cohorts |                        |         |
|------------------------------|--------------------|-----------------------|-------------------------|---------------------|---------|-----------------------------|------------------------|---------|
|                              | “Severe”           | “Moderate”            | “Mild”                  | “No”                |         | “Low”                       | “High”                 | P-Value |
|                              | < 8 g/dL<br>(n=58) | 8-9.9 g/dL<br>(n=523) | 10-11.9 g/dL<br>(n=207) | ≥ 12 g/dL<br>(n=12) |         | (<9.4 g/dL)<br>(n=410)      | (≥9.4 g/dL)<br>(n=390) |         |
| <b>% Tx RBC (WH)</b>         | 36 (62.1)          | 394 (75.3)            | 146 (70.5)              | 3 (25.0)            | 0.0005  | 306 (74.6)                  | 273 (70.0)             | 0.14    |
| <b>RBC unit/Pt (WH)</b>      | 3.2 ± 6.7          | 3.3 ± 3.6             | 4.5 ± 6.3               | 0.7 ± 1.7           | 0.0016  | 3.2 ± 4.3                   | 3.9 ± 5.2              | 0.04    |
| <b>% Tx Platelets</b>        | 29 (50.0)          | 289 (55.3)            | 106 (51.2)              | 4 (33.3)            | 0.35    | 219 (53.4)                  | 209 (53.6)             | 0.96    |
| <b>% Tx Plasma</b>           | 33 (56.9)          | 275 (52.6)            | 96 (46.4)               | 3 (25.0)            | 0.10    | 188 (45.9)                  | 205 (52.6)             | 0.06    |
| <b>% Tx RBC (Intraop)</b>    | 34 (58.6)          | 316 (60.4)            | 109 (52.3)              | 1 (8.3)             | 0.001   | 247 (60.2)                  | 213 (54.6)             | 0.11    |
| <b>RBC unit/Pt (Intraop)</b> | 1.2 ± 1.8          | 1.4 ± 1.8             | 1.5 ± 2.3               | 0.3 ± 0.9           | 0.15    | 1.35 ± 1.76                 | 1.45 ± 2.07            | 0.49    |
| <b>LOS (days)</b>            | 8 (6 – 11.3)       | 10 (7 – 14)           | 9 (7 – 15)              | 6.5 (5.3 – 10)      | 0.02    | 9 (7 – 13)                  | 10 (7 – 15)            | 0.005   |
| <b>Morbidity</b>             | 21 (36.2)          | 243 (46.5)            | 101 (48.8)              | 4 (33.3)            | 0.30    | 172 (42.0)                  | 197 (50.5)             | 0.015   |
| <b>30-Day Readmission</b>    | 11 (19.0)          | 56 (10.7)             | 18 (8.7)                | 0 (0.0)             | 0.12    | 47 (11.5)                   | 38 (9.7)               | 0.43    |

|                                                |             |             |                   |   |      |             |               |      |
|------------------------------------------------|-------------|-------------|-------------------|---|------|-------------|---------------|------|
| <b>Time to Readmission<br/>(days) – Median</b> | 10 (4 – 12) | 12 (5 – 18) | 17.5 (8.3 – 22.3) | — | 0.08 | 12 (5 – 18) | 11.5 (6 – 19) | 0.66 |
| <b>Time to Readmission<br/>(days) – Mean</b>   | 9.1 ± 5.2   | 12.4 ± 7.6  | 15.4 ± 7.5        | — | 0.08 | 12.2 ± 7.2  | 13.1 ± 7.8    | 0.60 |
| <b>% of Readmissions to<br/>Same Hospital</b>  | 6 (54.6)    | 24 (42.9)   | 6 (33.3)          | — | 0.54 | 22 (46.8)   | 14 (36.8)     | 0.35 |

---

Tx – Transfusion, WH – Whole hospital stay, Pt – Patient, LOS – Length of stay (median)

Values are reported as Mean ± SD, No. (%), or Median (IQR) as appropriate.

Supplemental Table 4: Clinical outcomes for the four anemia cohorts and “High” discharge Hb versus “Low” discharge Hb cohorts

(Subgroup of younger patients – age < 65 years)

| Parameter                    | Anemia Hb Cohorts  |                       |                         |                     |         | “Low” vs. “High” Hb Cohorts |                        |         |
|------------------------------|--------------------|-----------------------|-------------------------|---------------------|---------|-----------------------------|------------------------|---------|
|                              | “Severe”           | “Moderate”            | “Mild”                  | “No”                | P-value | “Low”                       | “High”                 | P-Value |
|                              | < 8 g/dL<br>(n=71) | 8-9.9 g/dL<br>(n=453) | 10-11.9 g/dL<br>(n=191) | ≥ 12 g/dL<br>(n=37) |         | (<9.4 g/dL)<br>(n=396)      | (≥9.4 g/dL)<br>(n=356) |         |
| <b>% Tx RBC (WH)</b>         | 41 (57.8)          | 288 (63.6)            | 110 (57.6)              | 11 (29.7)           | 0.0007  | 248 (62.6)                  | 202 (56.7)             | 0.10    |
| <b>RBC unit/Pt (WH)</b>      | 2.7 ± 6.0          | 2.7 ± 4.5             | 3.8 ± 7.8               | 1.3 ± 2.5           | 0.03    | 2.8 ± 5.02                  | 3.1 ± 6.2              | 0.39    |
| <b>% Tx Platelets</b>        | 38 (53.5)          | 234 (51.7)            | 93 (48.7)               | 8 (21.6)            | 0.004   | 208 (52.5)                  | 165 (46.4)             | 0.09    |
| <b>% Tx Plasma</b>           | 33 (46.5)          | 256 (56.5)            | 106 (55.5)              | 30 (81.1)           | 0.02    | 217 (54.8)                  | 213 (59.8)             | 0.16    |
| <b>% Tx RBC (Intraop)</b>    | 23 (32.4)          | 206 (45.5)            | 84 (44.0)               | 7 (18.9)            | 0.003   | 174 (43.9)                  | 146 (41.0)             | 0.42    |
| <b>RBC unit/Pt (Intraop)</b> | 0.7 ± 1.5          | 0.9 ± 1.6             | 1.0 ± 1.6               | 0.3 ± 1.0           | 0.12    | 0.82 ± 1.57                 | 0.88 ± 1.61            | 0.62    |
| <b>LOS (days)</b>            | 7 (6 – 13)         | 8 (6 – 13)            | 9 (7 – 13)              | 8 (6 – 10.5)        | 0.07    | 8 (6 – 13)                  | 9 (6 – 13)             | 0.18    |
| <b>Morbidity</b>             | 28 (39.4)          | 224 (49.5)            | 109 (57.1)              | 16 (43.2)           | 0.05    | 181 (45.7)                  | 196 (55.1)             | 0.01    |
| <b>30-Day Readmission</b>    | 11 (15.5)          | 53 (11.7)             | 21 (11.0)               | 3 (8.1)             | 0.70    | 50 (12.6)                   | 38 (10.7)              | 0.41    |

|                                                |            |               |               |             |      |               |                 |      |
|------------------------------------------------|------------|---------------|---------------|-------------|------|---------------|-----------------|------|
| <b>Time to Readmission<br/>(days) – Median</b> | 4 (2 – 13) | 10 (6.5 – 17) | 13 (6.5 – 19) | 19 (7 – 30) | 0.13 | 10 (5 – 16.3) | 12.5 (6.8 – 21) | 0.20 |
| <b>Time to Readmission<br/>(days) – Mean</b>   | 9.5 ± 10.0 | 12.3 ± 7.9    | 14.0 ± 7.5    | 18.7 ± 11.5 | 0.28 | 11.5 ± 7.9    | 13.9 ± 8.5      | 0.19 |
| <b>% of Readmissions to<br/>Same Hospital</b>  | 8 (72.7)   | 26 (49.1)     | 10 (47.6)     | 1 (33.3)    | 0.50 | 29 (58.0)     | 16 (42.1)       | 0.14 |

---

Tx – Transfusion, WH – Whole hospital stay, Pt – Patient, LOS – Length of stay (median)

Values are reported as Mean ± SD, No. (%), or Median (IQR) as appropriate.
